# Supplementary material for: Effect of modification of binary solvent molecules on ε-CL-20 crystal morphology: a molecular dynamics study
Source: Royal Society of Chemistry journal article supplement (doi:10.1039/d1ce00003a), 2021-01-01
Supplement: d1ce00003a1.pdf [file d1ce00003a1.pdf]

## Study on the crystallization mechanism of CL-20 in different binary solvents: the theoretical- experimental method.

Table S1. Energy details of  $\epsilon$ -cl-20-solvents interfacial models for each plane<sup>a</sup>.

|                                      | (h k l)  | $E_{tot}$  | $E_{sur}$  | $E_{sol}$                        | $E_{int}$ | $E_{att}^m$ | S%     |
|--------------------------------------|----------|------------|------------|----------------------------------|-----------|-------------|--------|
| Ethyl Acetate/<br>Dichloromethane    | (1 1 0)  | -20843.275 | -19305.573 | -1222.020                        | -315.682  | -17.956     | 51.414 |
|                                      | (0 0 1)  | -23566.820 | -21699.381 | -1420.813                        | -454.246  | 10.025      | 46.890 |
|                                      | (1 1 -1) | -23903.199 | -21698.846 | -1763.730                        | -440.623  | -23.708     |        |
|                                      | (0 1 1)  | -23989.402 | -21659.756 | -1785.863                        | -543.782  | 24.801      |        |
|                                      | (2 0 0)  | -16028.374 | -14479.605 | -1266.492                        | -282.278  | -63.846     |        |
|                                      | (2 0 -1) | -16002.755 | -14451.941 | -1229.859                        | -320.956  | -27.444     | 1.697  |
| Aspect Ratio:                        |          |            | 2.896      | Relative Surface / Volume Ratio: |           |             | 1.305  |
| Ethyl Acetate/<br>Dibromomethane     | (1 1 0)  | -21118.113 | -19308.142 | -1486.273                        | -323.698  | -16.210     | 58.920 |
|                                      | (0 0 1)  | -23933.319 | -21686.838 | -1754.105                        | -492.375  | 18.404      | 19.685 |
|                                      | (1 1 -1) | -24308.127 | -21701.739 | -2152.834                        | -453.554  | -21.674     | 14.497 |
|                                      | (0 1 1)  | -24412.588 | -21670.804 | -2177.646                        | -564.138  | 29.398      |        |
|                                      | (2 0 0)  | -16346.420 | -14483.281 | -1542.541                        | -320.597  | -59.617     |        |
|                                      | (2 0 -1) | -16334.910 | -14440.850 | -1553.476                        | -340.583  | -22.252     | 6.899  |
| Aspect Ratio:                        |          |            | 1.811      | Relative Surface / Volume Ratio: |           |             | 1.168  |
| Ethyl Acetate/<br>Chloroform         | (1 1 0)  | -21792.762 | -19301.462 | -2186.585                        | -304.714  | -20.345     | 36.234 |
|                                      | (0 0 1)  | -23838.325 | -21695.414 | -1701.785                        | -441.126  | 7.142       | 58.371 |
|                                      | (1 1 -1) | -24163.167 | -21705.294 | -2025.439                        | -432.434  | -24.997     |        |
|                                      | (0 1 1)  | -24292.370 | -21664.187 | -2066.844                        | -561.340  | 28.766      |        |
|                                      | (2 0 0)  | -16257.820 | -14475.843 | -1461.499                        | -320.478  | -59.630     |        |
|                                      | (2 0 -1) | -16260.622 | -14452.771 | -1473.729                        | -334.123  | -23.961     | 5.395  |
| Aspect Ratio:                        |          |            | 4.161      | Relative Surface / Volume Ratio: |           |             | 1.404  |
| Ethyl Acetate/<br>Tetrachloromethane | (1 1 0)  | -21129.617 | -19309.769 | -1507.046                        | -312.802  | -18.583     | 46.775 |
|                                      | (0 0 1)  | -23939.164 | -21696.648 | -1782.139                        | -460.377  | 11.372      | 37.252 |
|                                      | (1 1 -1) | -24275.305 | -21700.400 | -2111.947                        | -462.957  | -20.194     | 14.452 |
|                                      | (0 1 1)  | -24442.829 | -21673.554 | -2198.823                        | -570.451  | 30.824      |        |
|                                      | (2 0 0)  | -16337.393 | -14474.647 | -1556.516                        | -306.229  | -61.203     |        |
|                                      | (2 0 -1) | -16331.166 | -14450.759 | -1559.718                        | -320.689  | -27.515     | 1.521  |
| Aspect Ratio:                        |          |            | 2.594      | Relative Surface / Volume Ratio: |           |             | 1.209  |
| Ethyl Acetate/<br>Dichloroethane     | (1 1 0)  | -21700.642 | -19304.603 | -2044.008                        | -352.032  | -10.315     | 70.007 |
|                                      | (0 0 1)  | -24599.920 | -21683.210 | -2417.940                        | -498.769  | 19.815      | 9.098  |
|                                      | (1 1 -1) | -25102.630 | -21702.455 | -2927.642                        | -472.533  | -18.694     | 10.432 |
|                                      | (0 1 1)  | -25249.975 | -21669.712 | -2972.167                        | -608.096  | 39.326      |        |
|                                      | (2 0 0)  | -16929.749 | -14477.347 | -2125.039                        | -327.363  | -58.923     |        |

|                                        |               |            |            |                                  |          |         |        |
|----------------------------------------|---------------|------------|------------|----------------------------------|----------|---------|--------|
|                                        | (2 0 -1)      | -16920.703 | -14426.474 | -2127.571                        | -366.659 | -15.902 | 10.464 |
|                                        | Aspect Ratio: | 2.111      |            | Relative Surface / Volume Ratio: |          |         | 1.205  |
|                                        | (1 1 0)       | -20854.045 | -19310.684 | -1201.861                        | -341.500 | -12.333 | 53.116 |
| Ethyl<br>Acetate/<br>Tetrachloroethane | (0 0 1)       | -23624.288 | -21692.100 | -1468.550                        | -463.638 | 12.089  | 26.014 |
|                                        | (1 1 -1)      | -23846.231 | -21705.890 | -1680.886                        | -459.454 | -20.745 |        |
|                                        | (0 1 1)       | -24014.178 | -21678.091 | -1742.939                        | -593.148 | 35.950  |        |
|                                        | (2 0 0)       | -16080.015 | -14484.327 | -1247.806                        | -347.882 | -56.606 |        |
|                                        | (2 0 -1)      | -16079.323 | -14445.956 | -1252.468                        | -380.899 | -11.587 | 20.870 |
|                                        | Aspect Ratio: | 1.862      |            | Relative Surface / Volume Ratio: |          |         | 1.919  |
|                                        | (1 1 0)       | -20582.261 | -19303.978 | -958.961                         | -319.322 | -8.752  | 53.985 |
| Ethyl<br>Acetate/<br>n-Pentane         | (0 0 1)       | -23271.463 | -21691.696 | -1147.776                        | -431.991 | 5.134   | 46.015 |
|                                        | (1 1 -1)      | -23491.268 | -21698.154 | -1368.098                        | -425.017 | -24.265 |        |
|                                        | (0 1 1)       | -23578.955 | -21663.378 | -1410.778                        | -504.799 | 17.174  |        |
|                                        | (2 0 0)       | -15785.708 | -14477.995 | -986.346                         | -321.367 | -59.532 |        |
|                                        | (2 0 -1)      | -15778.694 | -14452.587 | -1029.541                        | -296.567 | -33.896 |        |
|                                        | Aspect Ratio: | 3.228      |            | Relative Surface / Volume Ratio: |          |         | 1.317  |
|                                        | (1 1 0)       | -20722.931 | -19309.521 | -1092.035                        | -321.375 | -16.716 | 20.194 |
| Ethyl<br>Acetate/<br>n-Hexane          | (0 0 1)       | -23420.994 | -21687.415 | -1336.536                        | -397.043 | -2.546  | 74.549 |
|                                        | (1 1 -1)      | -23714.585 | -21706.056 | -1567.357                        | -441.172 | -23.622 |        |
|                                        | (0 1 1)       | -23791.903 | -21669.248 | -1636.786                        | -485.870 | 11.721  | 5.257  |
|                                        | (2 0 0)       | -15931.961 | -14480.724 | -1168.001                        | -283.237 | -63.740 |        |
|                                        | (2 0 -1)      | -15867.108 | -14430.550 | -1164.420                        | -272.138 | -40.359 |        |
|                                        | Aspect Ratio: | 10.689     |            | Relative Surface / Volume Ratio: |          |         | 1.912  |
|                                        | (1 1 0)       | -20803.167 | -19300.022 | -1207.482                        | -295.663 | -22.317 | 28.493 |
| Ethyl<br>Acetate/<br>n-Heptane         | (0 0 1)       | -23513.277 | -21690.218 | -1447.058                        | -376.001 | -7.170  | 50.237 |
|                                        | (1 1 -1)      | -23835.113 | -21705.478 | -1717.569                        | -412.066 | -28.202 |        |
|                                        | (0 1 1)       | -23937.881 | -21669.198 | -1772.517                        | -496.166 | 14.047  | 20.769 |
|                                        | (2 0 0)       | -16020.802 | -14489.038 | -1251.139                        | -280.625 | -64.028 |        |
|                                        | (2 0 -1)      | -15991.876 | -14440.000 | -1256.019                        | -295.857 | -34.084 | 0.501  |
|                                        | Aspect Ratio: | 5.030      |            | Relative Surface / Volume Ratio: |          |         | 1.422  |
|                                        | (1 1 0)       | -21434.020 | -19312.350 | -1812.578                        | -309.092 | -19.392 | 25.870 |
| Ethyl<br>Acetate/<br>Cyclohexane       | (0 0 1)       | -24296.434 | -21690.883 | -2176.974                        | -428.576 | 4.384   | 64.967 |
|                                        | (1 1 -1)      | -24692.870 | -21700.885 | -2549.151                        | -442.833 | -23.361 |        |
|                                        | (0 1 1)       | -24883.833 | -21668.508 | -2721.115                        | -494.210 | 13.605  | 8.896  |
|                                        | (2 0 0)       | -16658.822 | -14479.440 | -1894.400                        | -284.981 | -63.547 |        |
|                                        | (2 0 -1)      | -16655.221 | -14437.565 | -1902.611                        | -315.044 | -29.008 | 0.268  |
|                                        | Aspect Ratio: | 7.062      |            | Relative Surface / Volume Ratio: |          |         | 1.618  |
|                                        | (1 1 0)       | -18364.679 | -19311.730 | 1257.363                         | -310.312 | -19.126 | 51.750 |
| Ethyl<br>Acetate/                      | (0 0 1)       | -20495.216 | -21687.390 | 1540.594                         | -348.421 | -13.231 | 34.772 |
|                                        | (1 1 -1)      | -20382.010 | -21701.788 | 1752.195                         | -432.417 | -25.000 | 2.229  |

|                                       |               |            |            |                                  |          |         |        |
|---------------------------------------|---------------|------------|------------|----------------------------------|----------|---------|--------|
|                                       | (0 1 1)       | -20303.989 | -21678.351 | 1895.030                         | -520.668 | 19.581  | 9.293  |
|                                       | (2 0 0)       | -13515.816 | -14482.284 | 1244.446                         | -277.977 | -64.320 |        |
|                                       | (2 0 -1)      | -13501.043 | -14452.768 | 1261.715                         | -309.990 | -30.345 | 1.956  |
|                                       | Aspect Ratio: | 2.393      |            | Relative Surface / Volume Ratio: |          | 1.216   |        |
|                                       | (1 1 0)       | -19512.847 | -19305.029 | 105.024                          | -312.842 | -18.575 | 53.084 |
|                                       | (0 0 1)       | -21861.564 | -21691.943 | 163.366                          | -332.988 | -16.623 | 21.799 |
| Ethyl<br>Acetate/<br>Toluene          | (1 1 -1)      | -21914.857 | -21703.659 | 180.754                          | -391.952 | -31.368 |        |
|                                       | (0 1 1)       | -21952.105 | -21673.431 | 240.525                          | -519.198 | 19.249  | 19.593 |
|                                       | (2 0 0)       | -14646.875 | -14476.385 | 94.093                           | -264.583 | -65.798 |        |
|                                       | (2 0 -1)      | -15239.312 | -14445.840 | -472.656                         | -320.815 | -27.482 | 5.523  |
|                                       | Aspect Ratio: | 1.809      |            | Relative Surface / Volume Ratio: |          | 1.167   |        |
|                                       | (1 1 0)       | -19349.713 | -19310.048 | 286.175                          | -325.841 | -15.743 | 36.999 |
|                                       | (0 0 1)       | -21731.431 | -21683.615 | 381.868                          | -429.683 | 4.627   | 62.979 |
| Ethyl<br>Acetate/<br>Bromoben<br>zene | (1 1 -1)      | -21752.315 | -21700.552 | 385.000                          | -436.763 | -24.316 |        |
|                                       | (0 1 1)       | -21767.458 | -21673.467 | 466.226                          | -560.218 | 28.513  |        |
|                                       | (2 0 0)       | -14516.585 | -14483.184 | 287.757                          | -321.158 | -59.555 |        |
|                                       | (2 0 -1)      | -14481.274 | -14446.165 | 292.990                          | -328.099 | -25.555 | 0.022  |
|                                       | Aspect Ratio: | 3.296      |            | Relative Surface / Volume Ratio: |          | 1.332   |        |

<sup>2a</sup>Energy unit is in kcal·mol<sup>-1</sup>
